# Supplementary material
Source: Springer Nature journal article supplement (https://www.springermedizin.de/resource/supplementary/12914_2011_201_MOESM1_ESM.pdf/9537056)

## Government

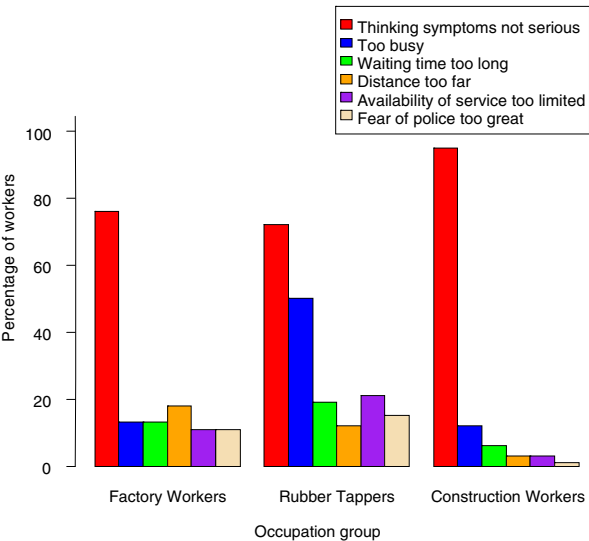

## Private

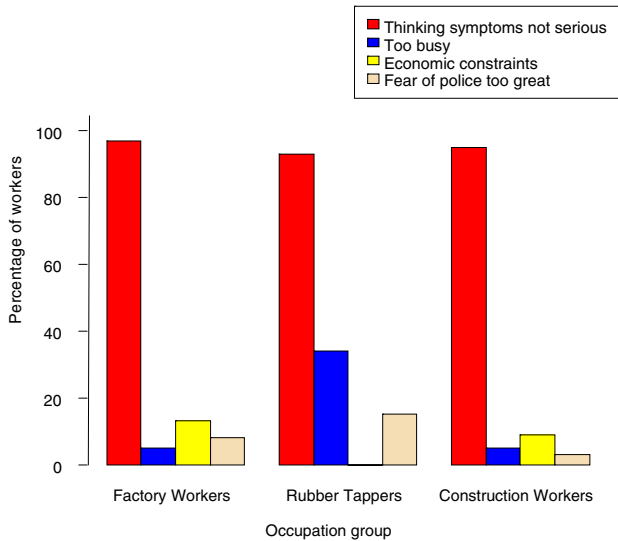

Supplement: MOESM1 [file 9537056]
